# Supplementary material
Source: PubMed Central journal article supplement (PMC4560639)
Supplement: NIHMS706046-supplement-3.pdf [file NIHMS706046-supplement-3.pdf]

## SUPPLEMENTARY TABLES

| Enzyme            | $K_m$ ( $\mu\text{M}$ ) | $k_{\text{cat}}$ ( $\text{s}^{-1}$ ) | $K_{\text{cat}}/K_m$ ( $\text{M}^{-1} \text{s}^{-1}$ ) | Reference |
|-------------------|-------------------------|--------------------------------------|--------------------------------------------------------|-----------|
| TNT               | $614 \pm 43$            | $51.7 \pm 1.1$                       | $8.4 \times 10^4$                                      | This work |
| SPN               | $188 \pm 23$            | $8,390 \pm 360$                      | $4.5 \times 10^7$                                      | 1         |
| Diphtheria Toxin  | $8.3 \pm 2$             | $8.3 \times 10^{-4}$                 | 100                                                    | 2         |
| Diphtheria Toxin* | 9                       | 0.58                                 | $6.4 \times 10^4$                                      | 3         |
| Diphtheria Toxin  | $85 \pm 13$             | $1.8 \times 10^{-3}$                 | 21.6                                                   | 4         |
| Diphtheria Toxin* | $6 \pm 2$               | $3.0 \pm 0.25$                       | $5.0 \times 10^5$                                      | 4         |
| Cholera Toxin     | $1.4 \times 10^4$       | 0.14                                 | 10                                                     | 5         |
| Cholix Toxin      | $67 \pm 4$              | $5.3 \times 10^{-4}$                 | 7.9                                                    | 6         |
| Cholix Toxin*     | $45 \pm 3$              | $10 \pm 3$                           | $2.3 \times 10^5$                                      | 6         |
| Pertussis Toxin   | 15.3                    | $1.8 \times 10^{-2}$                 | 1161                                                   | 7         |
| CD38              | $18 \pm 3$              | $148 \pm 8$                          | $8.2 \times 10^6$                                      | 1         |

### Supplementary Table 1. Enzymatic parameters of $\text{NAD}^+$ glycohydrolases

\* The enzymatic activities of ADP-ribosyltransferases was determined in the presence of the appropriate target proteins.

| Sample                     | N  | Live embryos |           |
|----------------------------|----|--------------|-----------|
|                            |    | 24 h.p.i.    | 48 h.p.i. |
| no injection               | 20 | 18 (90%)     | 17 (85%)  |
| buffer                     | 19 | 17 (89%)     | 15 (79%)  |
| BSA                        | 17 | 14 (82%)     | 12 (71%)  |
| TNT                        | 19 | 8 (42%)      | 4 (21%)   |
| -----                      |    |              |           |
| no injection               | 23 | 23 (100%)    | 22 (96%)  |
| buffer                     | 22 | 21 (95%)     | 21 (95%)  |
| TNT <sub>H792N Q822K</sub> | 22 | 20 (91%)     | 20 (91%)  |
| TNT-IFT complex            | 21 | 18 (86%)     | 18 (86%)  |

### Supplementary Table 2. Quantification of zebrafish zygote survival

\*Data were obtained from two separate experiments as indicated by the dotted line. h.p.i. hours post injection

| Strain                                      | Parent strain and relevant genotype                                                                              | Source or reference |
|---------------------------------------------|------------------------------------------------------------------------------------------------------------------|---------------------|
| <i>E. coli</i> DH5α                         | <i>recA1; endA1; gyrA96; thi; relA1; hsdR17(rK-;mK+); supE44; φ80ΔlacZΔM15; ΔlacZYA-argF; UE169</i>              | 8                   |
| <i>E. coli</i> BL21(DE3)                    | F <sup>-</sup> ; <i>ompT; hsdSB; (rB- mB-); gal; dcm lacYI</i> ; (DE3)                                           | 9                   |
| <i>E. coli</i> DH5αZ1                       | DH5α derivative, <i>lacI<sup>q</sup></i> , PN25-tetR, Sp <sup>R</sup> , deoR, supE44                             | 10                  |
| <i>M. tuberculosis</i> H37Rv                | Wild-type                                                                                                        | ATCC 25618          |
| <i>M. tuberculosis</i> mc <sup>2</sup> 6230 | H37Rv derivative; ΔRD1 (Δ <i>esx-1</i> ) and Δ <i>panCD</i>                                                      | Dr. Jacobs          |
| <i>M. tuberculosis</i> mc <sup>2</sup> 6206 | H37Rv derivative, Δ <i>leuCD</i> and Δ <i>panCD</i>                                                              | 11                  |
| <i>M. tuberculosis</i> ML2003               | mc <sup>2</sup> 6206 derivative, Δ <i>cpnT::mycgfp2+</i> , Hyg <sup>R</sup> , marked <i>cpnT</i> deletion mutant | 12                  |
| <i>M. tuberculosis</i> ML2004               | ML2003 derivative, unmarked <i>cpnT</i> deletion mutant                                                          | 12                  |
| <i>M. tuberculosis</i> ML2017               | ML2004 derivative, L5::pML3009, Kan <sup>R</sup>                                                                 | This work           |
| <i>M. tuberculosis</i> ML2018               | ML2004 derivative, L5::pML3167, Kan <sup>R</sup>                                                                 | This work           |

### Supplementary Table 3. Bacterial strains used in this work

ATCC: American Type Culture Collection

| <b>Oligonucleotide Sequence (5' → 3')</b> |                                                                                        |
|-------------------------------------------|----------------------------------------------------------------------------------------|
| CN605                                     | TCAGTGGTGGTGGTGGTGGT                                                                   |
| CN1394 <sup>§</sup>                       | <u>CGAAGCTT</u> CTACTGTCGCAACACCCCGCGC                                                 |
| CN2811 <sup>*,‡</sup>                     | <u>TATGGCTCTG</u> AAAATACAGGTTTTCCCGAGGTTGTTGTTATTGTTATTG<br>TTGTTGTTGTT <u>CGAGCT</u> |
| CN2816 <sup>†</sup>                       | TTCCCC <u>TCTAGA</u> ACCAACAAGGACCATAGATTATGAAAAT                                      |
| CN2939 <sup>¶</sup>                       | CC <u>AGATCT</u> ATGCGGTTATCCGACGAAGCG                                                 |
| CN2940 <sup>#</sup>                       | CTTTAATTAATCACTGTCGCAACACCCCGCGCC                                                      |
| CN2950 <sup>☆</sup>                       | GTA <u>AGGTACC</u> ATGGGGAGCCACCATCACCAT                                               |
| CN2951 <sup>§</sup>                       | ATTAA <u>AGCTT</u> AATCACTGTCGCAACACCCCGCGCC                                           |
| CN2988 <sup>☆</sup>                       | ATCC <u>GGTACC</u> ATGCGGTTATCCGACGAAGC                                                |
| CN3075 <sup>‡</sup>                       | TTTTCAGAGCCATATGACAATAGGTGTGGACCTGTCAA                                                 |
| CN3076 <sup>§</sup>                       | GGCCGCA <u>AGCTT</u> TAACCCCTTAGTCCTTCCAAAGGGT                                         |
| CN3078 <sup>‡</sup>                       | CAGAGCCATATGCGGTTATCCGACGAAGCGGTTGAC                                                   |
| CN3129 <sup>‡</sup>                       | GTCATATGAAAATCCATCACCATCAC                                                             |
| CN3130                                    | CTAGCGCTCTGAAAATACAGGTTTTTC                                                            |
| CN3146 <sup>§</sup>                       | CGAA <u>AGCTT</u> ATGGTGAGCAAGGGCGAG                                                   |
| CN3147 <sup>**</sup>                      | TCGGTCGACCCCTTGTACAGCTCGTCCAT                                                          |
| CN3185                                    | CGCATTATCCGCATTAACGACGATGATGTTTTCCGCCTCGGCTCTCGC<br>CAAATCCATCACCATCACCAT              |
| CN3186                                    | GGACCATAGATTATGAAAATAAAAACAGGTGCACGCATCCTCGCATTAT<br>CCGCATTAACGAC                     |
| CN3187 <sup>  </sup>                      | <u>TGCATGCTCT</u> CGAGTGCGGCCGCAAGCTT                                                  |
| CN3292                                    | GCGGATCCATCAAAGTGCGGATATTC                                                             |
| CN3293                                    | GAATATCCGCACTTTGATGGATCCGC                                                             |
| CN3357 <sup>**</sup>                      | GCAT <u>GTCGAC</u> CATGCGGTTATCCGACGAAGC                                               |
| CN3358 <sup>††</sup>                      | CGATGAATTCTCACTGTCGCAACACCCCGCGCC                                                      |

**Supplementary Table 4. Oligonucleotides used in this work.**

Restriction sites are underlined; \*: Scal, †: XbaI, ‡: NdeI, §: HindIII, ||: SphI, ¶: BglII, #: PaeI, ☆:

KpnI, \*\*: Sall, ††: EcoRI

| Plasmid            | Parent vector, relevant genotype and properties                                                                                                                               |               |
|--------------------|-------------------------------------------------------------------------------------------------------------------------------------------------------------------------------|---------------|
| pBAD/HisD-PATagRFP | pBAD/His-B derivative, pBR322 origin, <i>bla</i> , <i>araC</i> , p <sub>AraB</sub> -His-RFP, 4701 bp                                                                          | Dr. Verkhusha |
| pML3006            | pBAD/His-B derivative, pBR322 origin, <i>bla</i> , <i>araC</i> , p <sub>AraB</sub> -His-MCS, 4007 bp                                                                          | This work     |
| pML3007            | pBAD/His-B derivative, pBR322 origin, <i>bla</i> , <i>araC</i> , p <sub>AraB</sub> -His- <i>tnt</i> , 4601 bp                                                                 | This work     |
| pZE21MCS           | colE1 origin, <i>aph</i> , P <sub>LtetO-1</sub> , MCS, 2254 bp                                                                                                                | <sup>10</sup> |
| pML3030            | pZE21MCS derivative, colE1 origin, <i>aph</i> , P <sub>LtetO-1</sub> -His- <i>tnt</i> , 2856 bp                                                                               | This work     |
| pML3031            | pZE21MCS derivative, colE1 origin, <i>aph</i> , P <sub>LtetO-1</sub> - <i>tnt</i> , 2820 bp                                                                                   | This work     |
| pML1993            | pZE21MCS derivative, colE1 origin, <i>aph</i> , P <sub>LtetO-1</sub> - HIS- <i>malE</i> -POLYN-TEV- <i>tnt</i> , 4014 bp                                                      | This work     |
| pET-21a(+)         | pBR322 origin, <i>bla</i> , <i>lacI<sup>q</sup></i> , p <sub>T7lac</sub> , MCS, 5443 bp                                                                                       | Novagen       |
| pML1947            | pML1925, pMB1 origin, <i>rop</i> , <i>bla</i> , <i>lacI<sup>q</sup></i> , p <sub>tac</sub> -HIS- <i>malE</i> -POLYN-TEV-MCS, 5698 bp                                          | <sup>12</sup> |
| pML1970            | pET-21a(+), pBR322 origin, <i>bla</i> , <i>lacI<sup>q</sup></i> , p <sub>T7lac</sub> -HIS- <i>malE</i> -POLYN-TEV-MCS, 6618 bp                                                | This work     |
| pML1974            | pML1970 derivative, pBR322 origin, <i>bla</i> , <i>lacI<sup>q</sup></i> , p <sub>T7lac</sub> -HIS- <i>malE</i> -POLYN-TEV- <i>rv3902c</i> , 7087 bp                           | This work     |
| pML1995            | pML1970 derivative, pBR322 origin, <i>bla</i> , <i>lacI<sup>q</sup></i> , p <sub>T7lac</sub> -HIS- <i>malE</i> -POLYN-TEV- <i>tnt rv3902c</i> , 7677 bp                       | This work     |
| pML1997            | pML1995 derivative, pBR322 origin, <i>bla</i> , <i>lacI<sup>q</sup></i> , p <sub>T7lac</sub> -SP <sub>malE</sub> -HIS- <i>malE</i> -POLYN-TEV- <i>tnt rv3902c</i> , 7752 bp   | This work     |
| pDP3615            | pACYC184, p15A origin, <i>cam</i> , p <sub>tet</sub> - <i>hly</i> , 5625 bp                                                                                                   | <sup>13</sup> |
| pML1999            | pDP3615, p15A origin, <i>cam</i> , p <sub>tet</sub> - <i>rv3902c</i> , 4469 bp                                                                                                | This work     |
| pML2123            | ColE1 origin, hyg, oriM, psmyc-cpnTaa650-847 mutants (R757L, R757S, Q822K, G818V) translationally fused to HA-mycgfp2, 6861 bp                                                | <sup>12</sup> |
| pML3331            | pML1995 derivative, pBR322 origin, <i>bla</i> , <i>lacI<sup>q</sup></i> , p <sub>T7lac</sub> -HIS- <i>malE</i> -POLYN-TEV- <i>tnt<sub>H792N,Q822K</sub> rv3902c</i> , 7677 bp | This work     |
| pML3339            | pML3331 derivative, pBR322 origin, <i>bla</i> , <i>lacI<sup>q</sup></i> , p <sub>T7lac</sub> -HIS- <i>malE</i> -POLYN-TEV- <i>tnt<sub>H792N,Q822K</sub></i> , 7152 bp         | This work     |
| pML3035            | pML2093 <sup>12</sup> derivative, CMV promoter- <i>egfp-tnt<sub>wt</sub></i> , SV40 origin, pBR322 origin, <i>bla</i> , 6050 bp                                               | This work     |
| pML3036            | pML2138 <sup>12</sup> derivative, CMV promoter- <i>egfp-tnt<sub>G818V</sub></i> , SV40 origin, pBR322 origin, <i>bla</i> , 6050 bp                                            | This work     |
| pML3059            | pML3036 derivative, CMV promoter- <i>egfp-tnt<sub>mutants</sub></i> (H792N/Q822K, Q822A, R757L, Y765A, G818V), SV40 origin, pBR322 origin, <i>bla</i> , 5999 bp               | This work     |
| pMN437             | ColE1 origin, hyg, oriM, Psmyc- <i>mycgfp2+</i> , 6236 bp                                                                                                                     | <sup>14</sup> |
| pML3009            | PBR322 origin, <i>aph</i> , L5 attP, FRT-int-Pimyc- <i>esxF-esxE-cpnT-rv3902c</i> -FRT, 9790 bp                                                                               | <sup>12</sup> |
| pML3167            | PBR322 origin, <i>aph</i> , L5 attP, FRT-int-Pimyc- <i>esxF-esxE-cpnT<sub>H792N/Q822K</sub>-rv3902c</i> -FRT, 9789 bp                                                         | This work     |

**Supplementary Table 5. Plasmids used in this work.**
